# Supplementary material for: ISL1 controls pancreatic alpha cell fate and beta cell maturation
Source: PubMed Central journal article supplement (PMC9999528; doi:10.1186/s13578-023-01003-9), 2023-03-10
Supplement: 13578_2023_1003_MOESM1_ESM.pdf [file 13578_2023_1003_MOESM1_ESM.pdf]

# **Additional file 1**

## **Supplemental information**

### **ISL1 controls pancreatic alpha cell fate and beta cell maturation**

Romana Bohuslavova, Valeria Fabriciova, Laura Lebrón-Mora, Jessica Malfatti, Ondrej Smolik, Lukas Valihrach, Sarka Benesova, Daniel Zucha, Zuzana Berkova, Frantisek Saudek, Sylvia Evans, and Gabriela Pavlinkova

#### **This PDF file includes:**

Figures S1 to S7

Tables S1 to S3

Legends for Movies S1 to S4

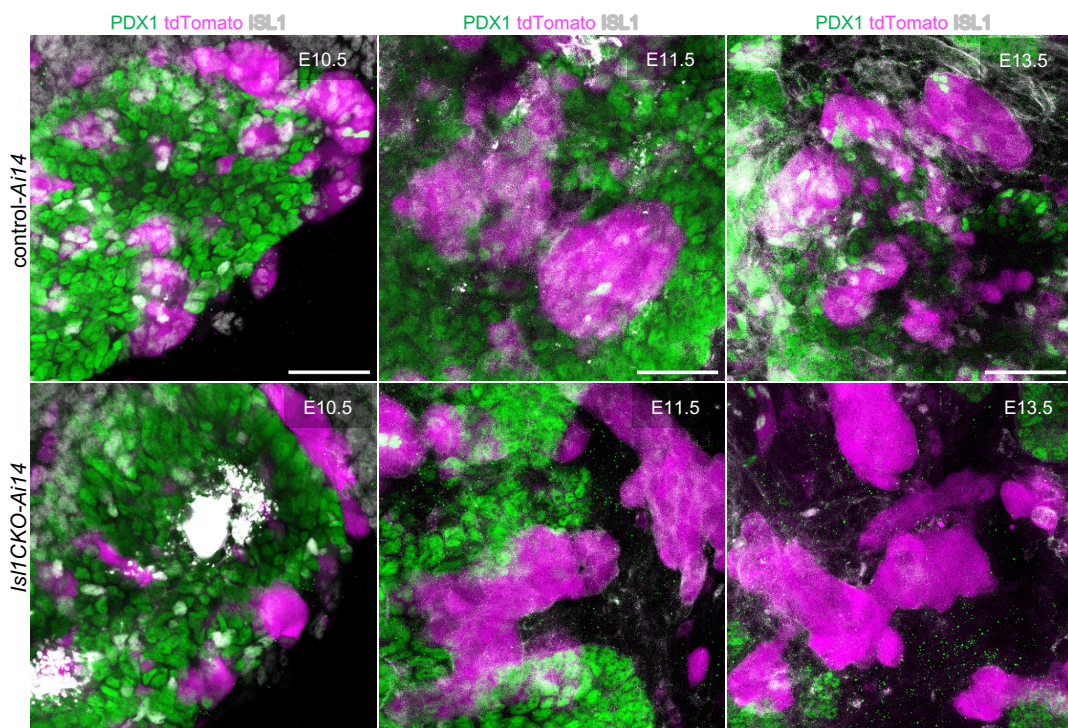

**Fig. S1** Efficient deletion of ISL1 in the *Isl1CKO* developing pancreas. Representative whole-mount immunolabeling of the pancreas of tdTomato reporter control-*Ai14* and *Isl1CKO-Ai14* embryos during the primary transitions (E10.5 and E11.5) and the secondary transition (E13.5) shows ISL1 expression in the Neurod1<sup>Cre</sup> positive domain visualized by tdTomato expression. The pancreatic epithelium is delineated by the expression of PDX1. Scale bars: 50  $\mu$ m.

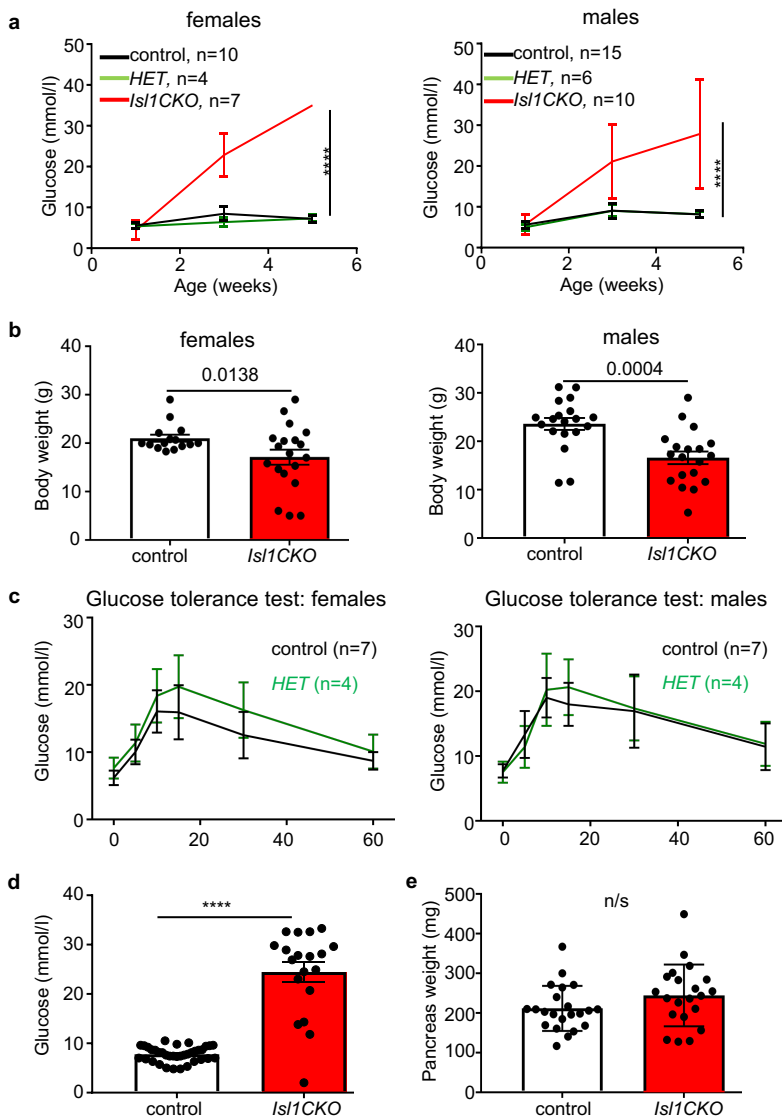

**Fig. S2** Diabetic phenotype of *Isl1CKO*. **a** The average blood glucose levels over time (from 1 week to 5 weeks of age) in females and males mice fed *ad libitum*. The 5 weeks of age female mice had blood glucose unmeasurable (above 35 mmol/l), the 5 week of age males show a high variability with 7 mice with blood glucose unmeasurable, and 3 with 0.8, 7.9 and 31.9 mmol/l. Data are presented as mean  $\pm$  SD, analyzed by two-way ANOVA (\*\*\*\* $P < 0.0001$ ). **b** The average body weight of adult female and male mice. Data are presented as mean  $\pm$  SEM, Student's *t* test. **c** Glucose tolerance test plotted using glucose vs time in heterozygous (*Neurod1<sup>Cre</sup>/Isl1<sup>lox</sup><sup>+/-</sup>*), and control mice. Data are presented as mean  $\pm$  SD, analyzed by two-way Anova with Bonferroni post-hoc analysis for glucose vs time. **d** Blood glucose concentration in adults fed *ad libitum*, 6-8 weeks of age. Only measurable levels of glucose (< 35 mmol/l) are shown for *Isl1CKO*. Data are presented as mean  $\pm$  SEM, Student's *t* test (\*\*\*\* $P < 0.0001$ ). **e** The weight of pancreas of adult mice. Total pancreas weights of  $244 \pm 78$  mg ( $n = 22$ ) in adult *Isl1CKO* mutants compared to those of controls ( $211 \pm 57$  mg,  $n = 21$ ). Data are presented as mean  $\pm$  SEM, Student's *t* test.

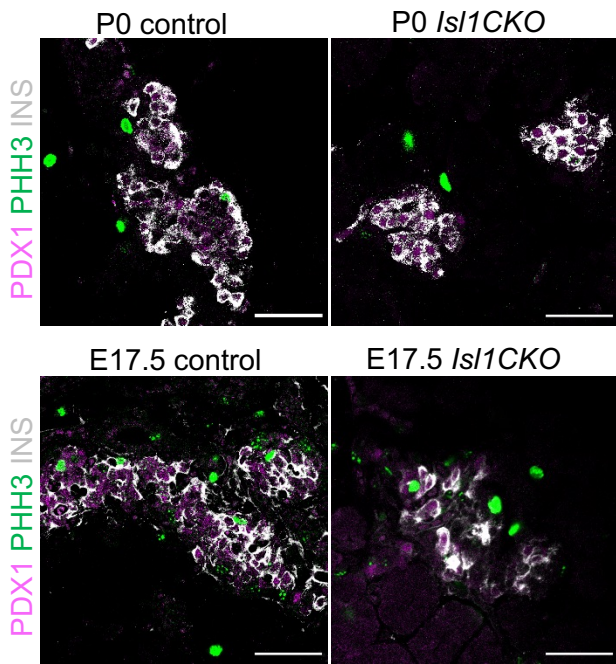

**Fig. S3** Immunolabeling for the marker of cellular mitosis, phosphorylated histone H3 (pHH3). Representative sections from the control and *Is11CKO* pancreas immunostained for insulin (INS) and PDX1 (marker of  $\beta$  cells) at P0 and E17.5. Scale bars: 50  $\mu$ m.

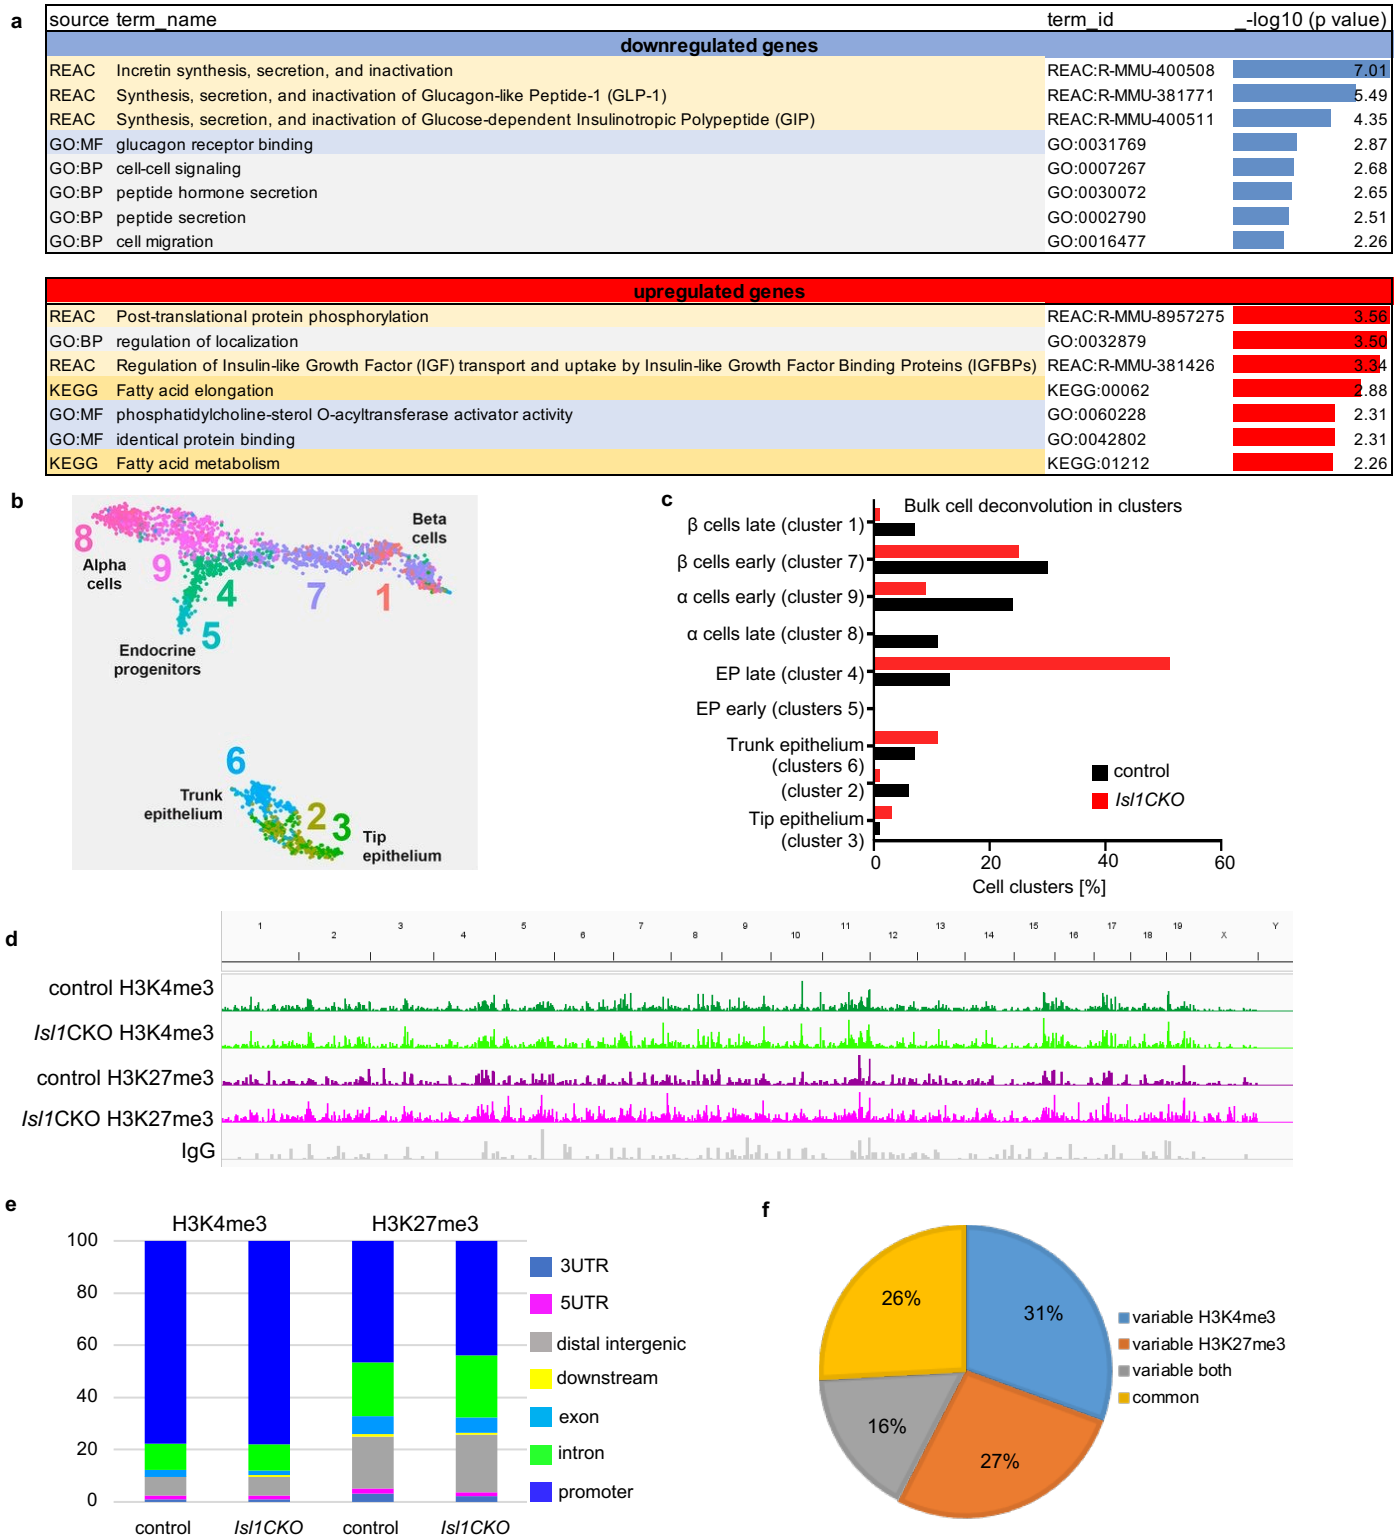

**Fig. S4** H3K4me3 and H3K27me3 CUT&Tag-seq analyses of E14.5 pancreatic endocrine cells. **a** The functional enrichment analysis of the differentially expressed genes in *Isl1CKO* was performed using g:Profiler (Gene Ontology: MF, molecular function; BP, biological processes). **b** A UMAP overview of nine cell clusters of different pancreatic cell types used as a reference for the cell type deconvolution analysis (van Gurp et al., 2019). **c** The deconvolved cell cluster proportions in E14.5 endocrine population from our bulk RNA-seq data of *Isl1CKO* and control. **d** The UCSC browser view of whole genome showing H3K4me3 and H3K27me3 peaks in control and *Isl1CKO* endocrine cells at E14.5 based on CUT&Tag-seq analyses. The mapped read counts distributed across all chromosomes are in comparable read depth for control and *Isl1CKO* samples. **e** Bar plot showing percentage of H3K4me3 and H3K27me3 peaks at promoter regions ( $\pm 3$  kb from TSS), gene body regions, and intergenic regions. **f** Pie chart illustrating the proportion of differentially expressed genes that differentially exhibited one or both H3K4me3 and H3K27me3 marks at their promoter regions from pairwise comparison of *Isl1CKO* and control pancreatic endocrine cells at E14.5.

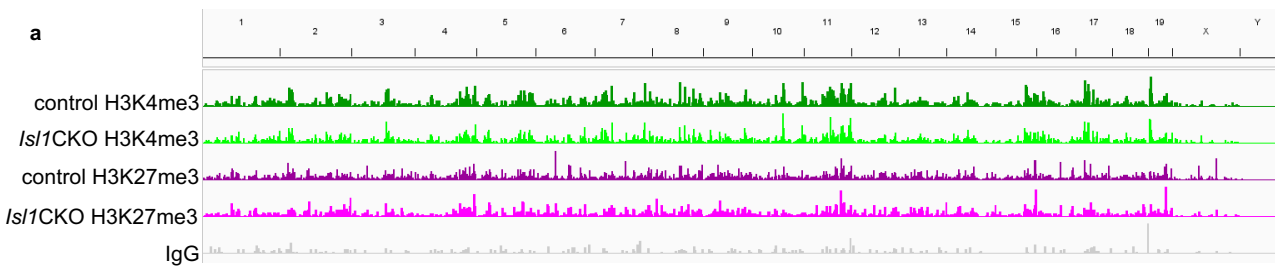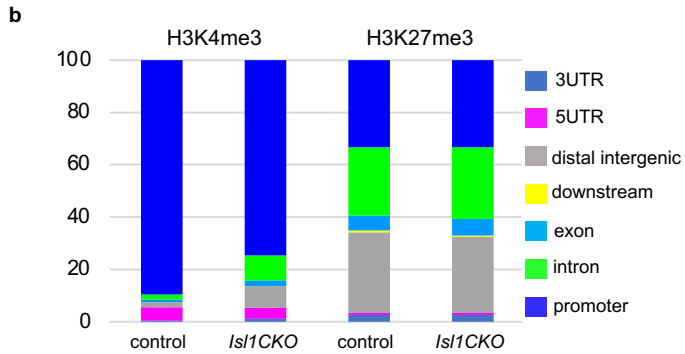

**Fig. S5** H3K4me3 and H3K27me3 CUT&Tag-seq analyses of P9 pancreatic endocrine cells. **a** The UCSC browser view of whole genome showing H3K4me3 and H3K27me3 peaks in control and *Is11CKO* endocrine cells at P9 based on CUT&Tag-seq analyses. The mapped read counts distributed across all chromosomes are in comparable read depth for control and *Is11CKO* samples. **b** Bar plot showing percentage of H3K4me3 and H3K27me3 peaks at promoter regions ( $\pm 3$  kb from TSS), gene body regions, and intergenic regions of endocrine cells of the P9 pancreas.

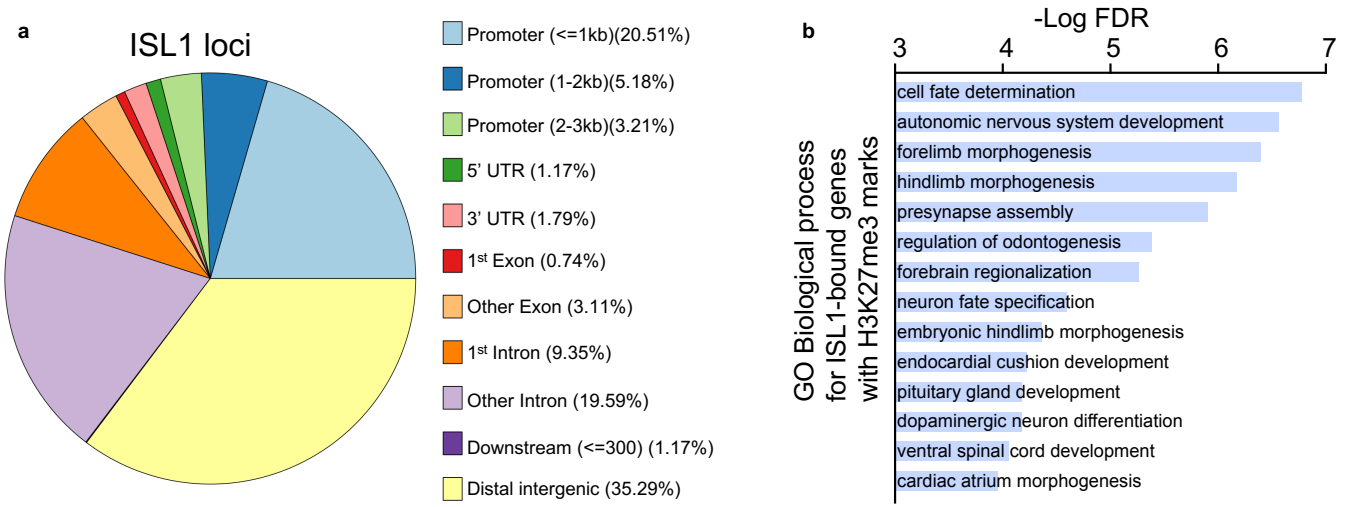

**Fig. S6** ISL1 binding CUT&Tag-seq analyses of E14.5 pancreatic endocrine cells. **a** Pie chart showing genomic distribution of ISL1 loci in E14.5 pancreatic endocrine cells. **b** The most enriched Gene Ontology (GO) biological processes for genes bound by ISL1 and with *Isl1CKO*-specific H3K27me3 depositions.

### control-Ai14

*(Isl1<sup>f/+</sup>; Neurod1<sup>Cre</sup>; tdTomatoAi14)*

### *Isl1CKO-Ai14*

*(Isl1<sup>f/f</sup>; Neurod1<sup>Cre</sup>; tdTomatoAi14)*

BD FACSDiva 8.0.1

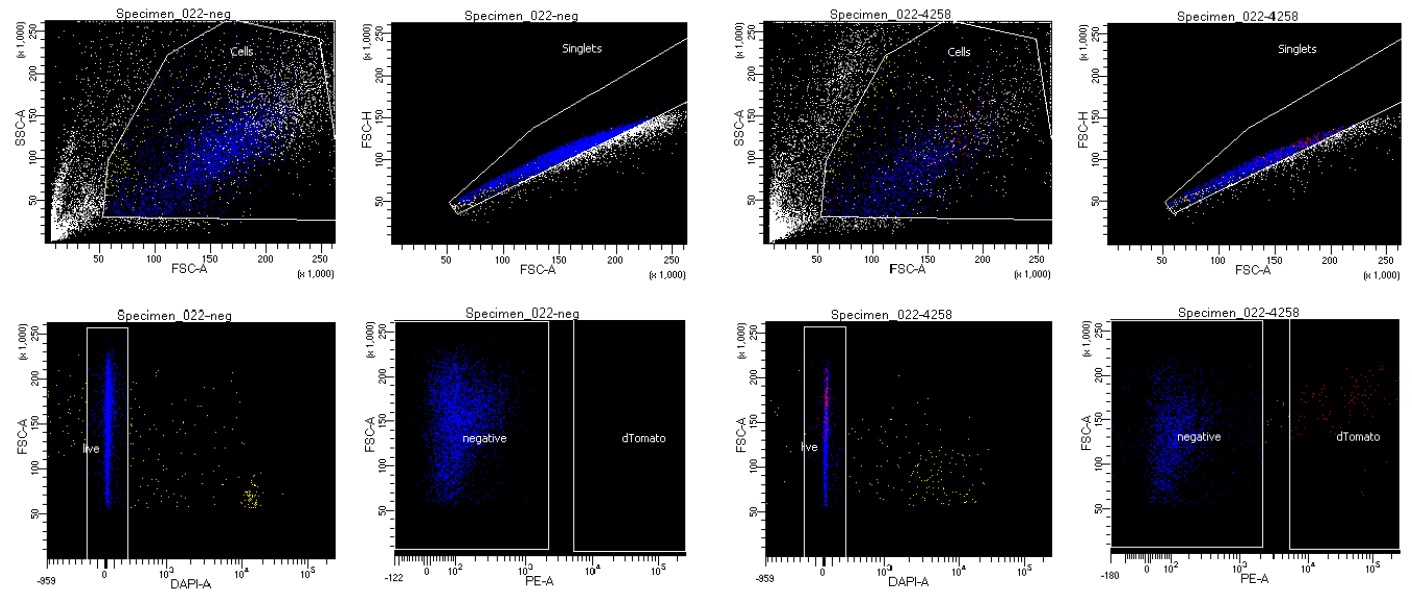

**Fig. S7** Gating strategy used to isolate tdTomato<sup>+</sup> cells. Representative example to show gating to purify live and individual tdTomato<sup>+</sup> cells for RNA-seq and CUT&Tag-seq.



## Supplementary Table S1. Primer sequences for genotyping

| <b>Gene</b>                    | <b>Primer sequence</b>      |
|--------------------------------|-----------------------------|
| <i>Isl1</i> <sup>flox</sup> _F | 5' CTCTGGAACATCCCACATTG 3'  |
| <i>Isl1</i> <sup>flox</sup> _R | 5' GATGCAACCCCTGTTCCCTAC 3' |
| <i>Neurod1/cre</i> _F          | 5' CCATTTTGCAGTGGACTCCT 3'  |
| <i>Neurod1/cre</i> _R          | 5' ACGGACAGAAGCATTTTCCA 3'  |
| WT- <i>TomatoAi14</i> _F       | 5' AAGGGAGCTGCAGTGGAGTA 3'  |
| WT- <i>TomatoAi14</i> _R       | 5' CCGAAAATCTGTGGGAAGTC 3'  |
| <i>Transgene-TomatoAi14</i> _F | 5' CTGTTCCCTGTACGGCATGG 3'  |
| <i>Transgene-TomatoAi14</i> _R | 5' GGCATTAAGCAGCGTATCC 3'   |

## Supplementary Table S2. Primer sequences for RT-qPCR

| <b>Gene</b>   | <b>Forward</b>                   | <b>Reverse</b>                      |
|---------------|----------------------------------|-------------------------------------|
| <i>Arx</i>    | 5' TTTTCTAGGAGCAGCGGTGT 3'       | 5' GGGCCATAGTGGAAGAGC 3'            |
| <i>Fev</i>    | 5' AAACATCTCTGCCGTTCCCC 3'       | 5' TGGGAGCTTTAATGGGGCTG 3'          |
| <i>Gcg</i>    | 5' CAGAAGAAGTCGCCATTGCC 3'       | 5' AAGTCCCTGGTGGCAAGATT 3'          |
| <i>Ghrl</i>   | 5' CCAGAGGACAGAGGACAAGC 3'       | 5' ACATCGAAGGGAGCATTGAA 3'          |
| <i>Ins1</i>   | 5' GACCAGCTATAATCAGAGACCATC 3'   | 5' GTAGGAAGTGCACCAACAGG 3'          |
| <i>Ins2</i>   | 5' GGCTTCTTCTACACACCCAT 3'       | 5' CCAAGGTCTGAAGGTCACCT 3'          |
| <i>Mafb</i>   | 5' GCAGGTATAAACGCGTCCAG 3'       | 5' TGAATGAGCTGCGTCTTCTC 3'          |
| <i>Ngn3</i>   | 5' AGTGCTCAGTTCCAATTCCAC 3'      | 5' CGGCTTCTTCGCTTTTTGCTG 3'         |
| <i>Peg10</i>  | 5' CCCTCATCCTTCGTGGCATC 3'       | 5' CTCGTGGTTGGCGTCTTTTG 3'          |
| <i>Pou3f4</i> | 5' CTGCCTCGAATCCCTACAGC 3'       | 5' CTGCAAGTAGTCACTTTGGAGAA 3'       |
| <i>Ppy</i>    | 5' CAGGCGACTATGCGACACC 3'        | 5' CAGGGAATCAAGCCAACTGG 3'          |
| <i>Sst</i>    | 5' ACCGGGAAACAGGAACTGG 3'        | 5' TTGCTGGGTTTCGAGTTGGC 3'          |
| <i>Hprt1</i>  | 5' GCTTGCTGGTGAAGGACCTCTCGAAG 3' | 5' CCTGAAGTACTCATTATAGTCAAGGGCAT 3' |

### Supplementary Table S3. List of antibodies

| primary antibody | host species | company                      | catalog number | dilution |
|------------------|--------------|------------------------------|----------------|----------|
| Alpha-Amylase    | rabbit       | Sigma-Aldrich                | A8273          | 1:2500   |
| Cre Recombinase  | rabbit       | BioLegend                    | 908001         | 1:500    |
| GLP1             | rabbit       | Abcam                        | ab111125       | 1:10 000 |
| Glucagon         | mouse IgG1   | Abcam                        | ab10988        | 1:400    |
| Glucagon         | goat         | BIO-RAD                      | 4660-1140      | 1:500    |
| Histone H3K4me3  | rabbit       | Active Motif                 | 39159          | 1:100    |
| Histone H3K27me3 | rabbit       | Active Motif                 | 39155          | 1:100    |
| Insulin          | rabbit       | Cell Signaling               | C27C9          | 1:400    |
| Insulin          | guinea pig   | Abcam                        | ab7842         | 1:50     |
| *Islet1/2        | mouse IgG2b  | Developmental Hybridoma Bank | 39.4D5         | 1:200    |
| Ki67             | rabbit       | Cell Signaling               | 9129           | 1:400    |
| NeuroD1          | goat         | Santa Cruz Biotechnology     | sc-1084        | 1:100    |
| NGN3             | mouse        | DSHB                         | F25A1B3        | 1:3      |
| NKX6.1           | mouse        | DSHB                         | F64A6B4        | 1:3      |
| Pax6             | rabbit       | BioLegend                    | 901301         | 1:100    |
| PDX1             | rabbit       | Abcam                        | ab47267        | 1:2 000  |
| PHH3             | rabbit       | Merck                        | 06-570         | 1:100    |
| TUBB3            | mouse        | BioLegend                    | 801202         | 1:500    |

| secondary antibody                                                                        | host species | company                | catalog number | dilution |
|-------------------------------------------------------------------------------------------|--------------|------------------------|----------------|----------|
| Alexa Fluor® <b>405</b> -conjugated<br>AffiniPure Donkey Anti- <b>Goat</b> IgG<br>(H+L)   | donkey       | Jackson ImmunoResearch | 705-475-147    | 1:500    |
| Alexa Fluor® <b>488</b> -conjugated<br>AffiniPure Donkey Anti- <b>Rabbit</b><br>IgG (H+L) | donkey       | Jackson ImmunoResearch | 711-545-152    | 1:500    |
| Alexa Fluor® <b>647</b> -conjugated<br>AffiniPure Donkey Anti- <b>mouse</b><br>IgG        | donkey       | Jackson ImmunoResearch | 715-605-151    | 1:500    |
| Alexa Fluor® <b>594</b> AffiniPure Goat<br>Anti- <b>Rabbit</b> IgG (H+L)                  | goat         | Jackson ImmunoResearch | 111-585-144    | 1:500    |
| Alexa Fluor® <b>488</b> AffiniPure Goat<br>Anti- <b>Mouse</b> IgG (H+L)                   | goat         | Jackson ImmunoResearch | 115-545-146    | 1:500    |
| DyLight <b>405</b> -conjugated<br>AffiniPure Goat Anti- <b>Guinea Pig</b><br>IgG (H+L)    | goat         | Jackson ImmunoResearch | 106-475-003    | 1:500    |

\*Monoclonal antibody 39.4D5 was deposited to the DSHB by Jessell, T.M. / Brenner-Morton, S. (DSHB Hybridoma Product 39.4D5).

# Legends for Movies

**Video S1. P9 control tdTomato GLP1 INS.** Microdissected pancreas of tdTomato reporter control-*Ai14* mice was cleared (CUBIC protocol), immunolabeled, imaged, and reconstructed in 3D using light-sheet fluorescence microscopy (LFSM). Video shows the distribution and formation of islets in the anatomical microenvironment of the pancreas at P9; tdTomato<sup>+</sup> endocrine cell population (magenta),  $\beta$  cells with expression of insulin (white), and  $\alpha$  cells expressing glucagon-like peptide-1 (green).

**Video S2. P9 ISL1CKO tdTomato GLP1 INS.** Microdissected pancreas of tdTomato reporter *Isl1CKO-Ai14* mice were cleared (CUBIC protocol), immunolabeled, imaged, and reconstructed in 3D using light-sheet fluorescence microscopy (LFSM). Video shows the distribution and formation of islets in the anatomical microenvironment of the pancreas; tdTomato<sup>+</sup> endocrine cell population (magenta),  $\beta$  cells with expression of insulin (white), and  $\alpha$  cells expressing glucagon-like peptide-1 (green).

**Video S3. P9 control tdTomato GLP1 Tubulin.** Microdissected pancreas of tdTomato reporter control-*Ai14* mice were cleared (CUBIC protocol), immunolabeled, imaged, and reconstructed in 3D using light-sheet fluorescence microscopy (LFSM). LFSM video shows the distribution and formation of islets in the anatomical microenvironment of the pancreas at P9; tdTomato<sup>+</sup> endocrine cells (magenta),  $\alpha$  cells expressing glucagon-like peptide-1 (green), and neuronal fibers labeled by anti-tubulin (white fibers).

**Video S4. P9 Isl1CKO tdTomato GLP1 Tubulin.** Microdissected pancreas of tdTomato reporter *Isl1CKO-Ai14* mice were cleared (CUBIC protocol), immunolabeled, imaged, and reconstructed in 3D using light-sheet fluorescence microscopy (LFSM). LFSM video shows the distribution and formation of islets in the anatomical microenvironment of the pancreas at P9; tdTomato<sup>+</sup> endocrine cells (magenta),  $\alpha$  cells expressing glucagon-like peptide-1 (green) and neuronal fibers labeled by anti-tubulin (white fibers).
